# Supplementary material for: Fabrication of Biocompatible Electrospun Poly(ε-caprolactone)/Gelatin Nanofibers Loaded with Pinus radiata Bark Extracts for Wound Healing Applications
Source: MDPI journal article supplement (doi:10.3390/polym14122331), 2022-06-09
Supplement: s1 [file s1]

# Fabrication of Biocompatible Electrospun Poly ( $\epsilon$ -caprolactone)/Gelatin Nanofibers Loaded with *Pinus Radiata* Bark Extracts for Wound Healing Applications

Jessica Borges-Vilches <sup>1</sup>, Irem Unalan <sup>2</sup>, Katherina Fernández <sup>1</sup> and Aldo R. Boccaccini <sup>2,\*</sup>

<sup>1</sup> Laboratory of Biomaterials, Department of Chemical Engineering, Faculty of Engineering, Universidad de Concepción, Concepción 4030000, Chile; jessborges@udec.cl (J.B.-V.); kfernandez@udec.cl (K.F.)

<sup>2</sup> Institute of Biomaterials, Department of Materials Science and Engineering, Friedrich-Alexander-University Erlangen-Nuremberg, Cauerstraße 6, 91058 Erlangen, Germany; irem.unalan@fau.de

\* Correspondence: aldo.boccaccini@ww.uni-erlangen.de

## Figures and Tables

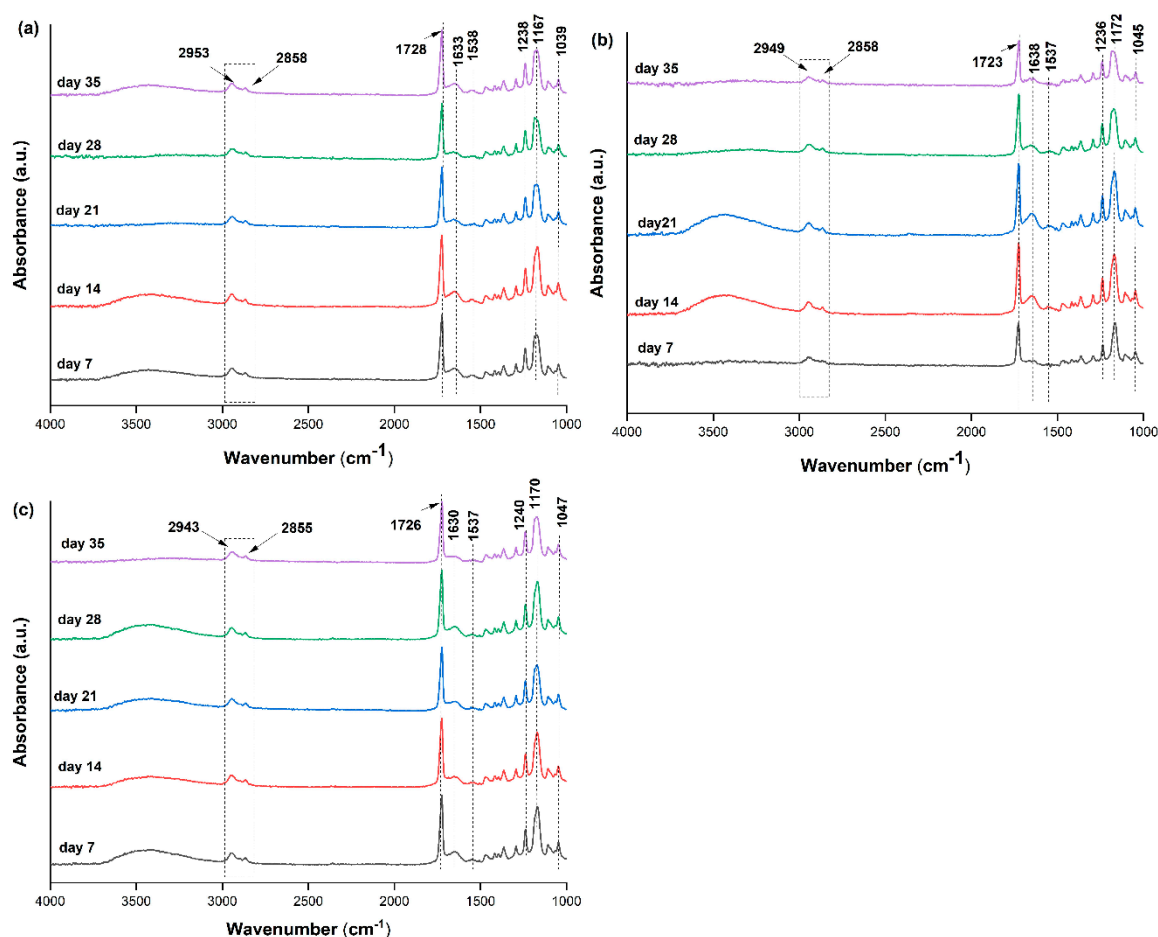

**Figure S1.** FTIR spectra obtained during the *in vitro* degradation assay of (a) PCL/GEL, (b) PCL/GEL/0.18%PE, and (c) PCL/GEL/0.36%PE electrospun nanofiber mats.

**Table S1.** Phenol composition and content of the *Pinus Radiata* bark extract.

| Compounds                      | Content (mg per gram of extract) |
|--------------------------------|----------------------------------|
| (-)-Catechin                   | 13.8                             |
| Taxifolin                      | 13.9                             |
| <i>p</i> -Hydroxybenzoic acid  | 7.6                              |
| Homovanillic acid <sup>a</sup> | 6.7                              |

|                                    |     |
|------------------------------------|-----|
| Quercetin                          | 4.3 |
| Proanthocyanidin B-2               | 3.3 |
| (+)-Epicatechin                    | 2.8 |
| Dihydroxybenzoic acid <sup>b</sup> | 2.7 |
| Dihydroxybenzoic acid <sup>b</sup> | 1.8 |
| Syringic acid <sup>a</sup>         | 1.1 |
| 3,4-dihydroxyphenyl acetic acid    | 0.9 |
| Dihydroxybenzoic acid <sup>b</sup> | 0.2 |
| Epigallocatechin                   | n.d |

n.d.: not detected, a: tentatively identified compounds, b: not recognized isomers.

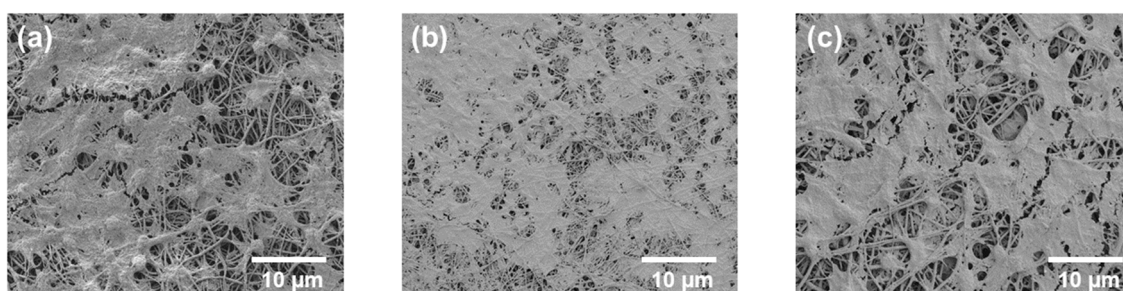

**Figure S2.** SEM micrographs of HaCaT cells cultured on (a) PCL/GEL, (b) PCL/GEL/0.18%PE, and (c) PCL/GEL/0.36%PE electrospun nanofiber mats. The images were taken after incubation and staining studies.

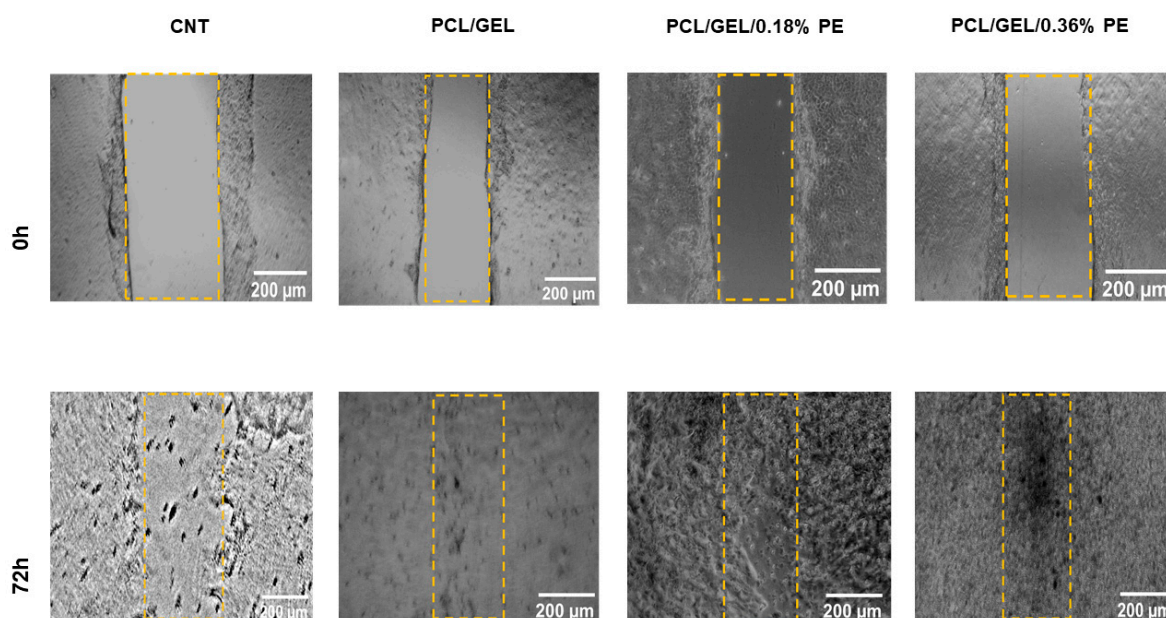

**Figure S3.** Micrographs of the cell migration into a scratch area over a 72h period in CNT, PCL/GEL, PCL/GEL/0.18%PE, and PCL/GEL/0.36%PE electrospun nanofiber mats, respectively.
